# Supplementary material
Source: Royal Society of Chemistry journal article supplement (doi:10.1039/d6ta02789j)
Supplement: d6ta02789j1.pdf [file d6ta02789j1.pdf]

## Supporting Information

### Compositionally Graded Ni–YDC Thin-Film Anodes via Oblique Angle Sputtering for Low-Temperature SOFC

*Sangyong Choi,<sup>†</sup> Jaewon Hwang,<sup>†</sup> Jaewon Yoo, Daniel Gil, , Yujae Jang, Seungjae Lee,  
Inyoung Jeong, Nguyen Q. Minh\*, Sanghoon Lee\*, and Suk Won Cha\**

Sangyong Choi, Dr. Jaewon Hwang, Jaewon Yoo, Daniel Gil, Yujae Jang, SeungJae Lee,  
Inyoung Jeong, Prof. Suk Won Cha

Department of Mechanical Engineering, Seoul National University, 1 Gwanak-ro, Gwanak-gu,  
Seoul 08826, Republic of Korea

Dr. Nguyen Q. Minh

Center for Energy Research, University of California, La Jolla, San Diego, CA, 92093, USA

Email: [nminh@ucsd.edu](mailto:nminh@ucsd.edu)

Dr. Sanghoon Lee

Center for Energy Research, University of California, La Jolla, San Diego, CA, 92093, USA

# Present address: Energy and Environment Directorate, Pacific Northwest National  
Laboratory, 902 Battelle Boulevard, Richland, WA, 99354, USA

Email: [sanghoon.lee@pnnl.gov](mailto:sanghoon.lee@pnnl.gov)

Prof. Suk Won Cha

Department of Mechanical Engineering, Seoul National University

Institute of Advance Machines and Design, Seoul National University

Email: [swcha@snu.ac.kr](mailto:swcha@snu.ac.kr)

**Table S1.** Porosity of the Ni–YDC thin-film anodes as a function of Ni deposition power..

|          | N90Y   | N110Y  | N130Y  | N150Y  |
|----------|--------|--------|--------|--------|
| Porosity | 12.37% | 15.48% | 19.26% | 22.14% |

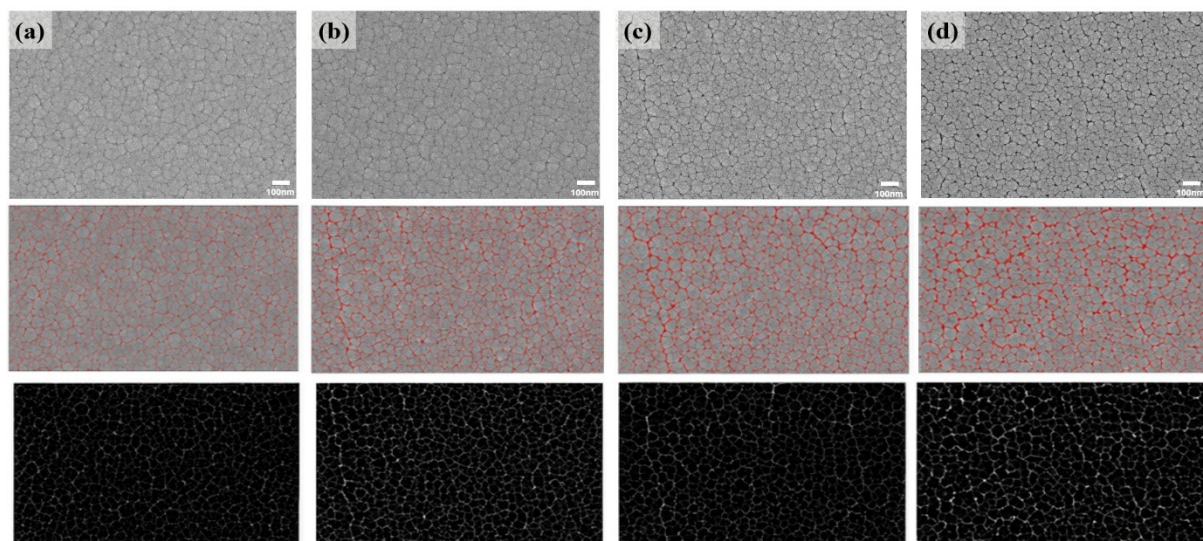

**Figure S1.** Surface morphology of single-layer Ni–YDC thin films (a) N90Y, (b) N110Y, (c) N130Y, and (d) N150Y. The corresponding surface porosities are summarized in Table S1

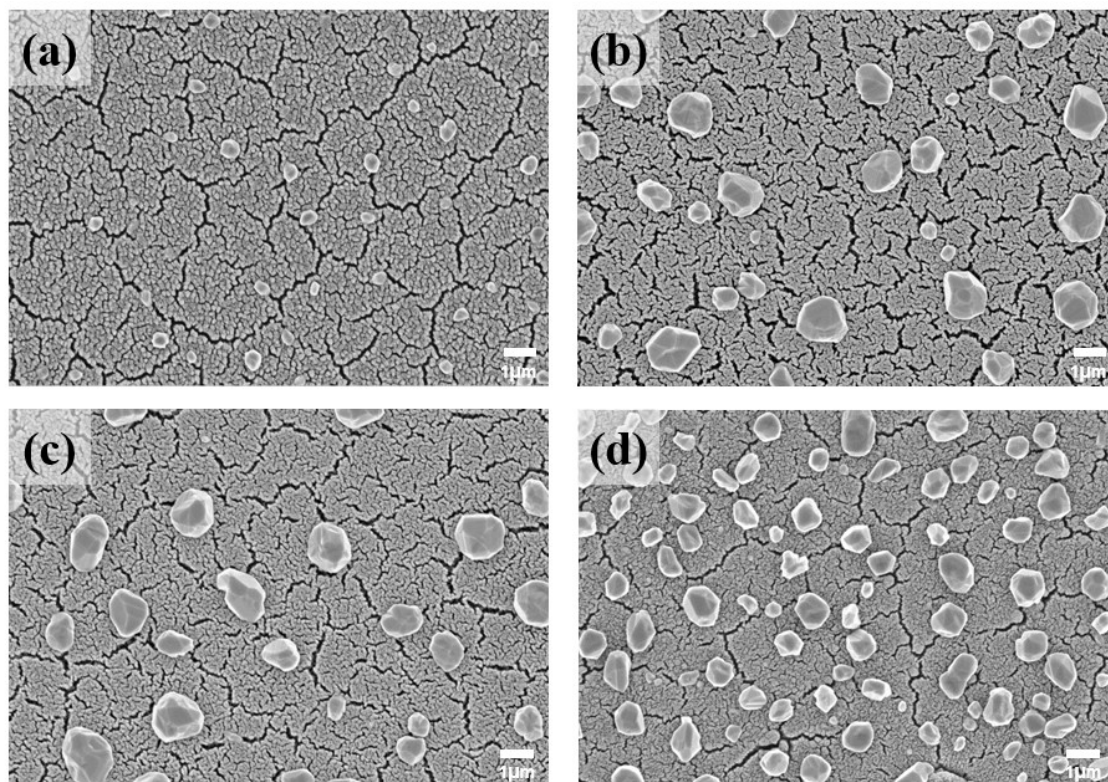

**Figure S2.** FESEM microstructural analysis of single-layer Ni–YDC thin-film anodes deposited on Si wafers. (a–d) Surface morphology after 6 hours of thermal reduction at 500 °C for: (a) N90Y, (b) N110Y, (c) N130Y, and (d) N150Y.

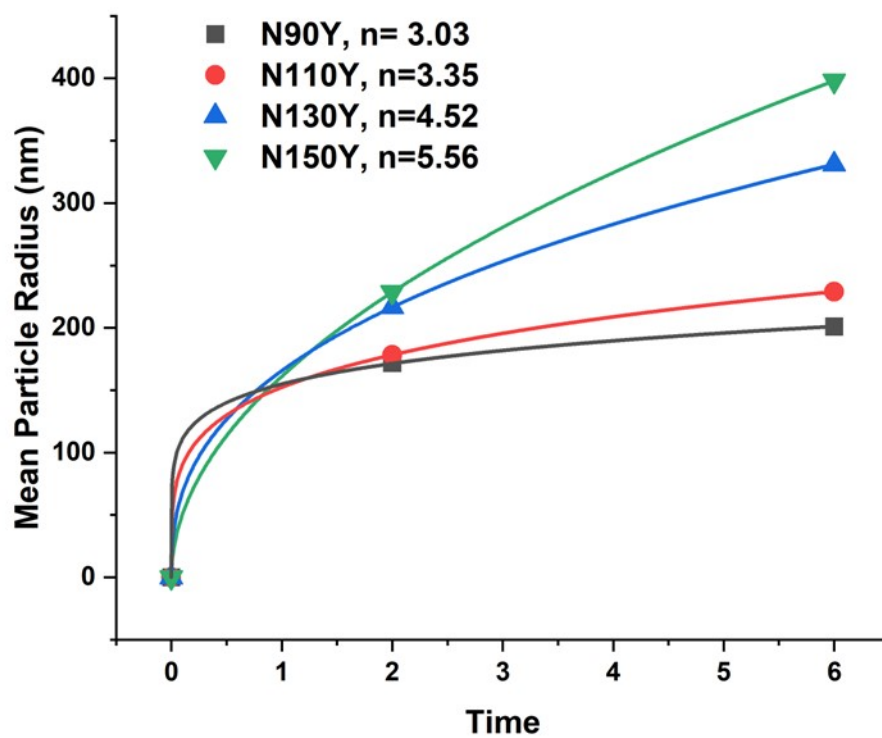

**Figure S3.** Time-dependent growth of surface Ni particle radius during operation at 500 °C, overlaid with the fitted power-law coarsening kinetics.

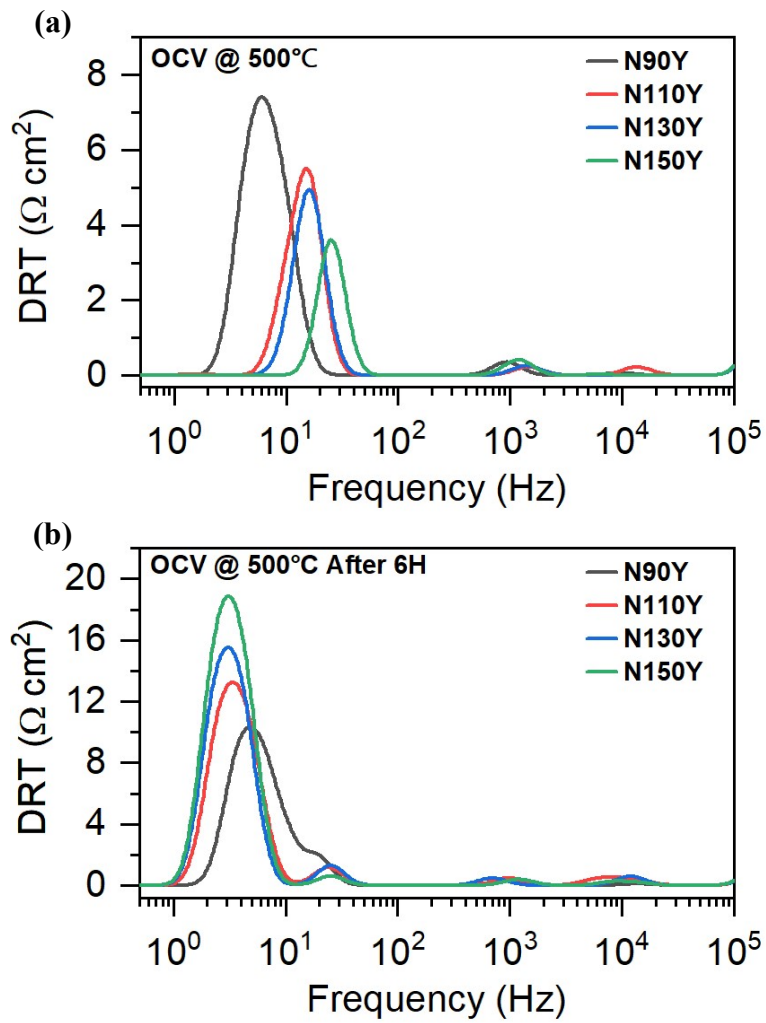

**Figure S4.** Distribution of relaxation times (DRT) analysis for electrolyte-supported SOFCs featuring N90Y, N110Y, N130Y, and N150Y anodes at 500 °C. (a, b) DRT spectra derived from the impedance spectra measured (a) initially and (b) after 6 hours of operation under OCV conditions.

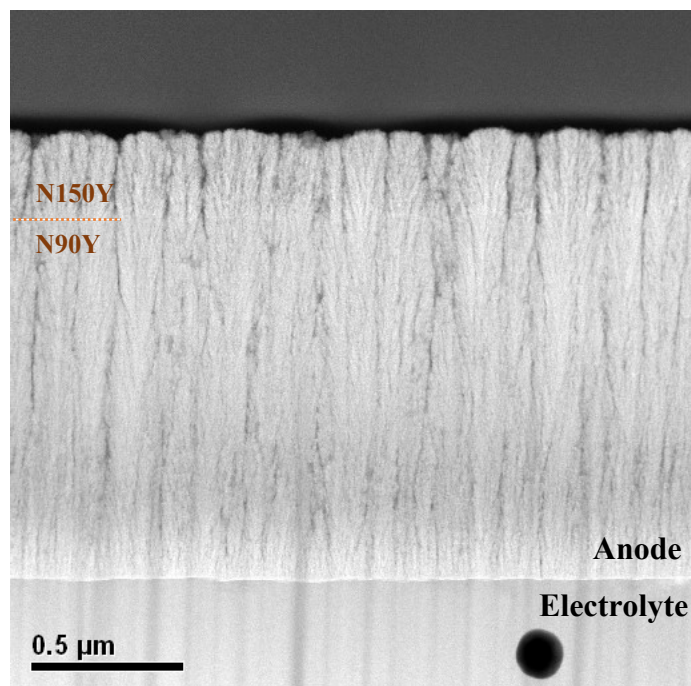

**Figure S5.** Cross-sectional Scanning Transmission Electron Microscopy (STEM) image of Cell#2-1. The compositionally graded Ni–YDC thin-film anode consists of an N150Y layer at the electrolyte interface and an N90Y layer at the channel interface.

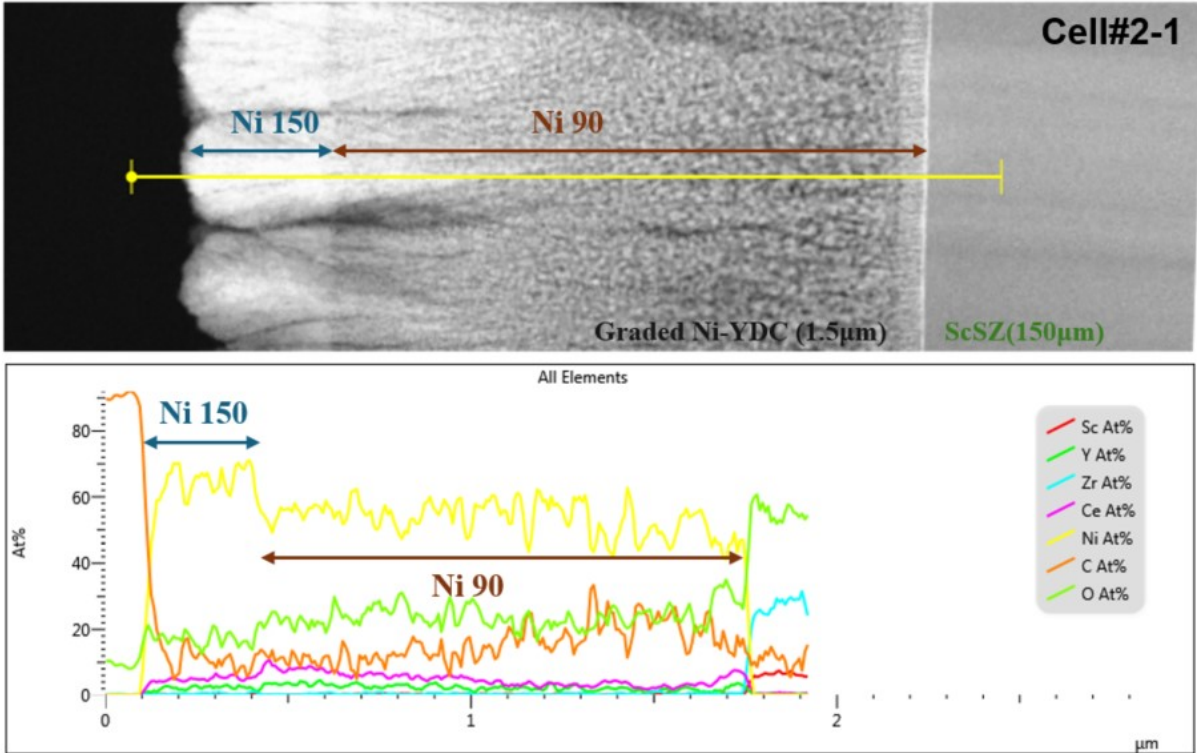

**Figure S6.** Microstructural and chemical analysis of the Cell#2-1 fuel electrode after 6 hours of operation: (a) TEM-EDS line-scan profiles showing atomic concentration gradients across the fuel electrode and interface after the 6-hour durability test.

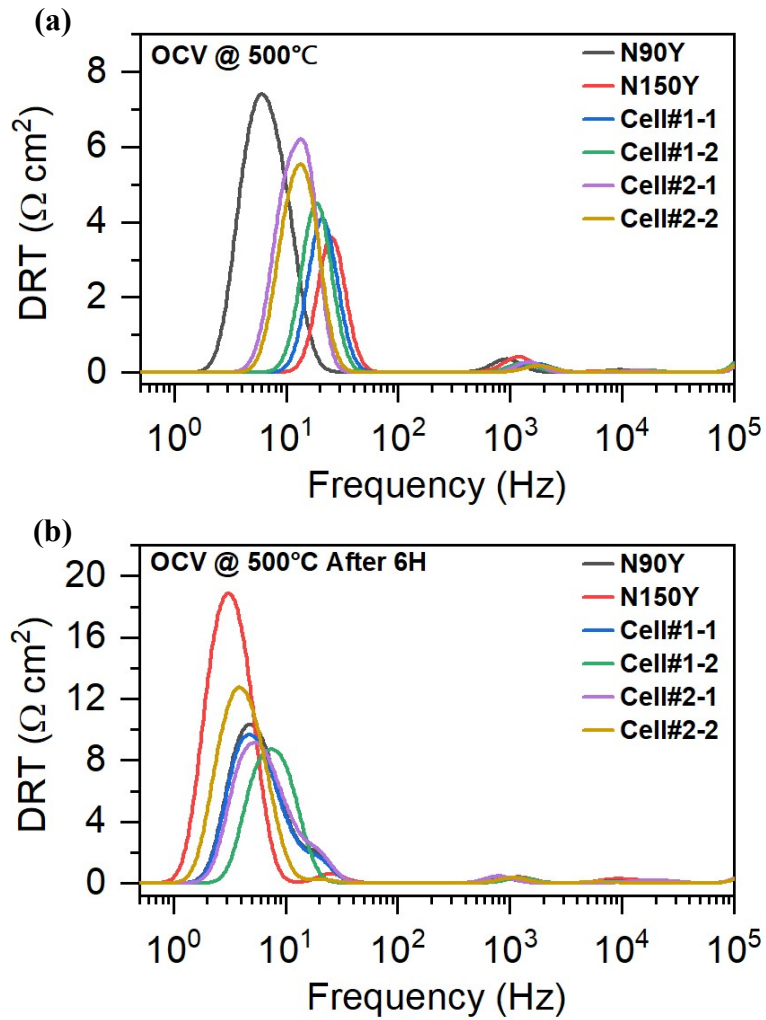

**Figure S7.** Distribution of relaxation times (DRT) analysis for electrolyte-supported SOFCs comparing reference cells (N90Y and N150Y) and compositionally graded Ni–YDC anode cells (Cell#1-1, Cell#1-2, Cell#2-1, and Cell#2-2) at 500 °C. (a, b) DRT spectra derived from the impedance spectra measured (a) initially and (b) after 6 hours of operation under OCV conditions..
